# Supplementary material for: Systematic study of tissue section thickness for MALDI MS profiling and imaging
Source: Royal Society of Chemistry journal article supplement (doi:10.1039/d2an01739c), 2023-01-01
Supplement: d2an01739c1.pdf [file d2an01739c1.pdf]

## Supporting Information

### **Systematic study of tissue section thickness for MALDI MS profiling and imaging**

Xiaofei Wang<sup>b</sup>, Lu Zhang<sup>b</sup>, Yuhong Xiang<sup>b</sup>, Nengsheng Ye<sup>b\*</sup>, Kehui Liu<sup>a,c,d\*</sup>

<sup>a</sup>Department of Chemistry, Capital Normal University, Beijing, 100048, China;

<sup>b</sup>State Key Laboratory of Membrane Biology, Institute of Zoology, Chinese Academy of Sciences, Beijing 100101, China;

<sup>c</sup>Institute for Stem Cell and Regeneration, Chinese Academy of Sciences, 100101 Beijing, China;

<sup>d</sup>University of Chinese Academy of Sciences, Beijing 100049, China.

\* Corresponding authors: Nengsheng Ye, [yensh@cnu.edu.cn](mailto:yensh@cnu.edu.cn), Kehui Liu, [liukehui@ioz.ac.cn](mailto:liukehui@ioz.ac.cn).

## CONTENTS

|                                                                                                                                        |    |
|----------------------------------------------------------------------------------------------------------------------------------------|----|
| Supporting information.....                                                                                                            | 3  |
| <b>Figure S1.</b> AP MALDI mass spectra of there different thickness section at different voltages                                     | 4  |
| <b>Figure S2.</b> mean ions signal intensity and image of there different thickness section at different voltages .....                | 5  |
| <b>Figure S3.</b> optical images of the winkle and no winkle tissues .....                                                             | 5  |
| <b>Figure S4.</b> representative lipids ions vacuum MALDI MS peaks acquired from brain tissue section with different thicknesses ..... | 6  |
| <b>Figure S5.</b> representative peptide ions AP MALDI MS peaks acquired brain tissue section with different thicknesses .....         | 7  |
| <b>Figure S6.</b> Vacuum MALDI MS data obtained from heart tissue slices with different thicknesses. ....                              | 8  |
| <b>Figure S7.</b> Vacuum MALDI MS data obtained from liver tissue slices with different thicknesses.....                               | 8  |
| <b>Figure S8.</b> Vacuum MALDI MS data obtained from lung tissue slices with different thicknesses.....                                | 9  |
| <b>Figure S9.</b> Vacuum MALDI MS data obtained from kindy tissue slices with different thicknesses. ....                              | 9  |
| <b>Figure S10.</b> Vacuum MALDI MS data obtained from muscel tissue slices with different thicknesses.....                             | 10 |
| <b>Table S1.</b> Percentage reduction in average peak intensity and peak number relative to 5 $\mu\text{m}$ (%) .....                  | 10 |
| <b>Table S2.</b> Representative lipids detected in mouse brain tissue section by AP MALDI MS ..                                        | 10 |
| <b>Table S3.</b> Representative lipids detected in mouse brain tissue section by vacuum MALDI MS.....                                  | 11 |
| <b>Table S4.</b> Peptides percentage reduction relative to 5 $\mu\text{m}$ (%).....                                                    | 12 |
| <b>Table S5.</b> Representative peptides detected in brain tissue section by AP MALDI MS .....                                         | 12 |
| <b>Table S6.</b> Theoretical optimal MALDI MSI slice thickness range of various tissues in mice                                        | 13 |
| References.....                                                                                                                        | 13 |

## Supporting information

### Extraction all proteins from tissues and trypsin digestion.

The tissue was frozen in liquid nitrogen and ground into powder. 2 mL of lysate solution (1% sodium dodecyl sulfate, 100 mM ethylenediaminetetraacetic acid, and 0.1 mM phenylmethyl sulfonyl fluoride) was added into the tissue sample. The mixture was vibrated by pulsed ultrasonication for 5 min (ultrasonic 2 s/stop 3 s), then was kept at 4 °C for 1 h, followed by centrifugation at 13,000 r/min for 20 min. The supernatant was collected and ready for the trypsin digestion.

300  $\mu$ L 0.15 M dithiothreitol solution was added to 150  $\mu$ L protein extract (about 50-100  $\mu$ g protein) and the mixture was incubated at 56 °C for 1 h. The mixture was then added to a filter centrifuge tube with 30 KDa molecular weight cutoff (Microcon YM-30, Merck Millipore, Ltd. Tullagreen, Ireland) and centrifuged at 14,000 g for 15 min. After centrifugation, the liquid in the tube was discarded.

For the following washing steps, centrifugation was all conducted at 14,000 g for 10-15 min and the liquid in the tube was discarded after each centrifugation if without mentioned. (1) 200  $\mu$ L washing buffer UA (8 M urea, 0.1M Tris-HCl, pH 8.5) was added to the filter tube and centrifuged. (2) 100 $\mu$ L of 10 mg/mL iodoacetamide solution was added into the filter tube. It was stored in dark for 1h and then centrifuged. (3) The filter was washed twice by adding 100  $\mu$ L UA and being centrifuged. (4) The filter was further washed twice by adding 100  $\mu$ L  $\text{NH}_4\text{HCO}_3$  and being centrifuged.

The outer filter tube was replaced by a new tube and 40  $\mu$ L 0.05 mg/mL trypsin solution in 50 mM  $\text{NH}_4\text{HCO}_3$  was added and the mixture was vortexed, followed by an incubation at 37 °C for 18 h and centrifugation. Additional 40  $\mu$ L of  $\text{NH}_4\text{HCO}_3$  solution was added to the filter tube and centrifuged to collect the residue peptides left on the filter. The eluted sample was desalted and lyophilized, then dissolved in 0.1% formic acid, followed by filtration.

### LC-MS/MS detection of all peptide in tissues and establishment of whole peptide information database library

The whole process was largely followed the literature <sup>1</sup>. The peptides were resuspended in 0.1% formic acid (FA) and analyzed by a Orbitrap Exploris 480 mass spectrometer (ThermoFisher Scientific) coupled online to an Easy-nLC 1200 in the data-dependent mode. Briefly, 2  $\mu$ L of peptide sample (1  $\mu$ g/ $\mu$ L) was injected into a 25 cm long, 150 $\mu$ m inner diameter capillary analytic column packed with C18 particles of 1.9  $\mu$ m diameter. The mobile phases for the LC included buffer A (2% ACN and 0.1% FA) and buffer B (98% ACN and 0.1% FA). The peptides were separated using a 90 min nonlinear gradient consisting of 3–8% B for 10 min, 8–20% B for 60 min, 20–30% B for 8 min, 30–100% B for 2 min, and 100% B for 10 min with a flow rate of 600 nL/min. The source voltage and current were set at 2.5 kV and 100  $\mu$ A, respectively. All MS measurements were performed in the positive ion mode and acquired across the mass range of m/z 300–1800 Da. The fifteen most intense ions from each MS scan were isolated and fragmented by HCD. The mass spectrometry proteomics data have been deposited to the ProteomeX change Consortium (<http://proteomecentral.proteomexchange.org>) via the PRIDE partner repository with the dataset identifier PXD001246 <sup>2</sup>. The raw MS files were analyzed by the software MaxQuant version 1.4.1.2.

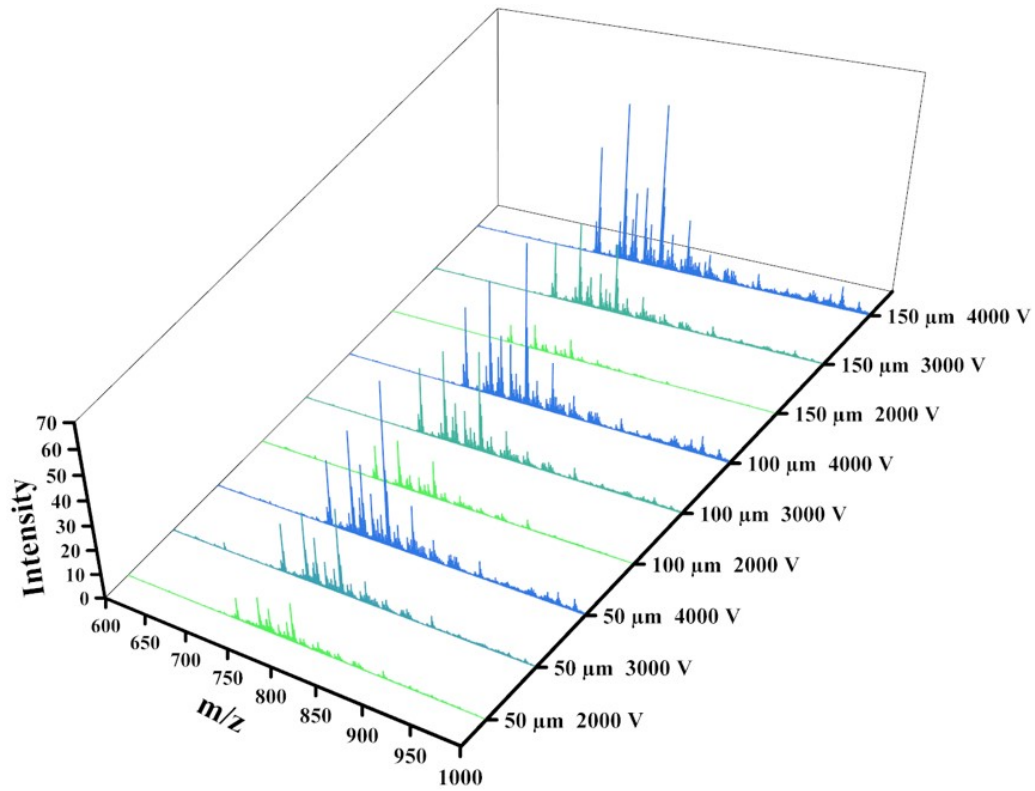

**Figure S1.** AP MALDI mean mass spectra of there different thickness consecutive mouse brain tissue section (50, 100, 150 μm) at different voltages (2000, 3000, 4000 V)

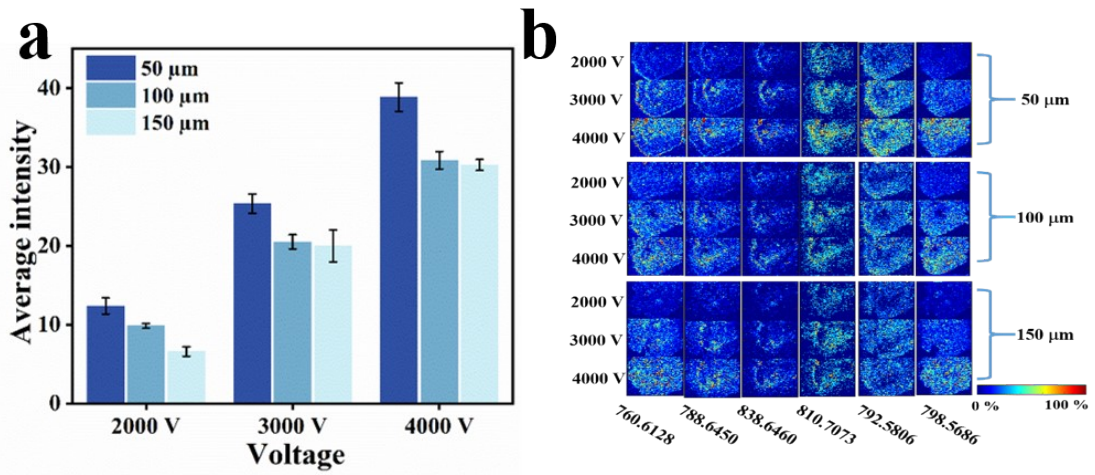

**Figure S2. a.** AP MALDI mean ions signal intensity **b.** AP MALDI MSI of there different thickness consecutive mouse half brain tissue section (50, 100, 150 μm) at different voltages(2000, 3000, 4000 V)

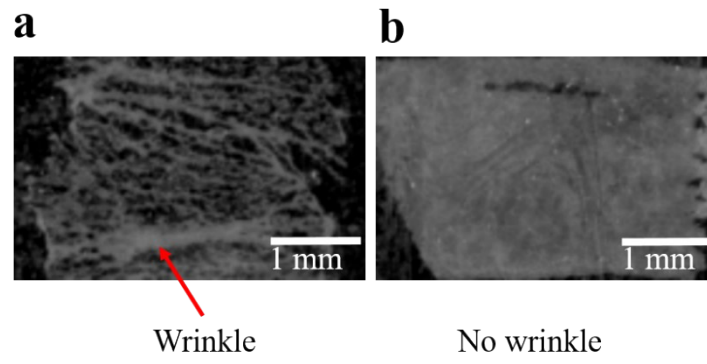

**Figure S3.** **a.** Optical images of the wrinkle tissues (0.4  $\mu\text{m}$ ) **b.** optical images of the no wrinkle tissues (10  $\mu\text{m}$ )

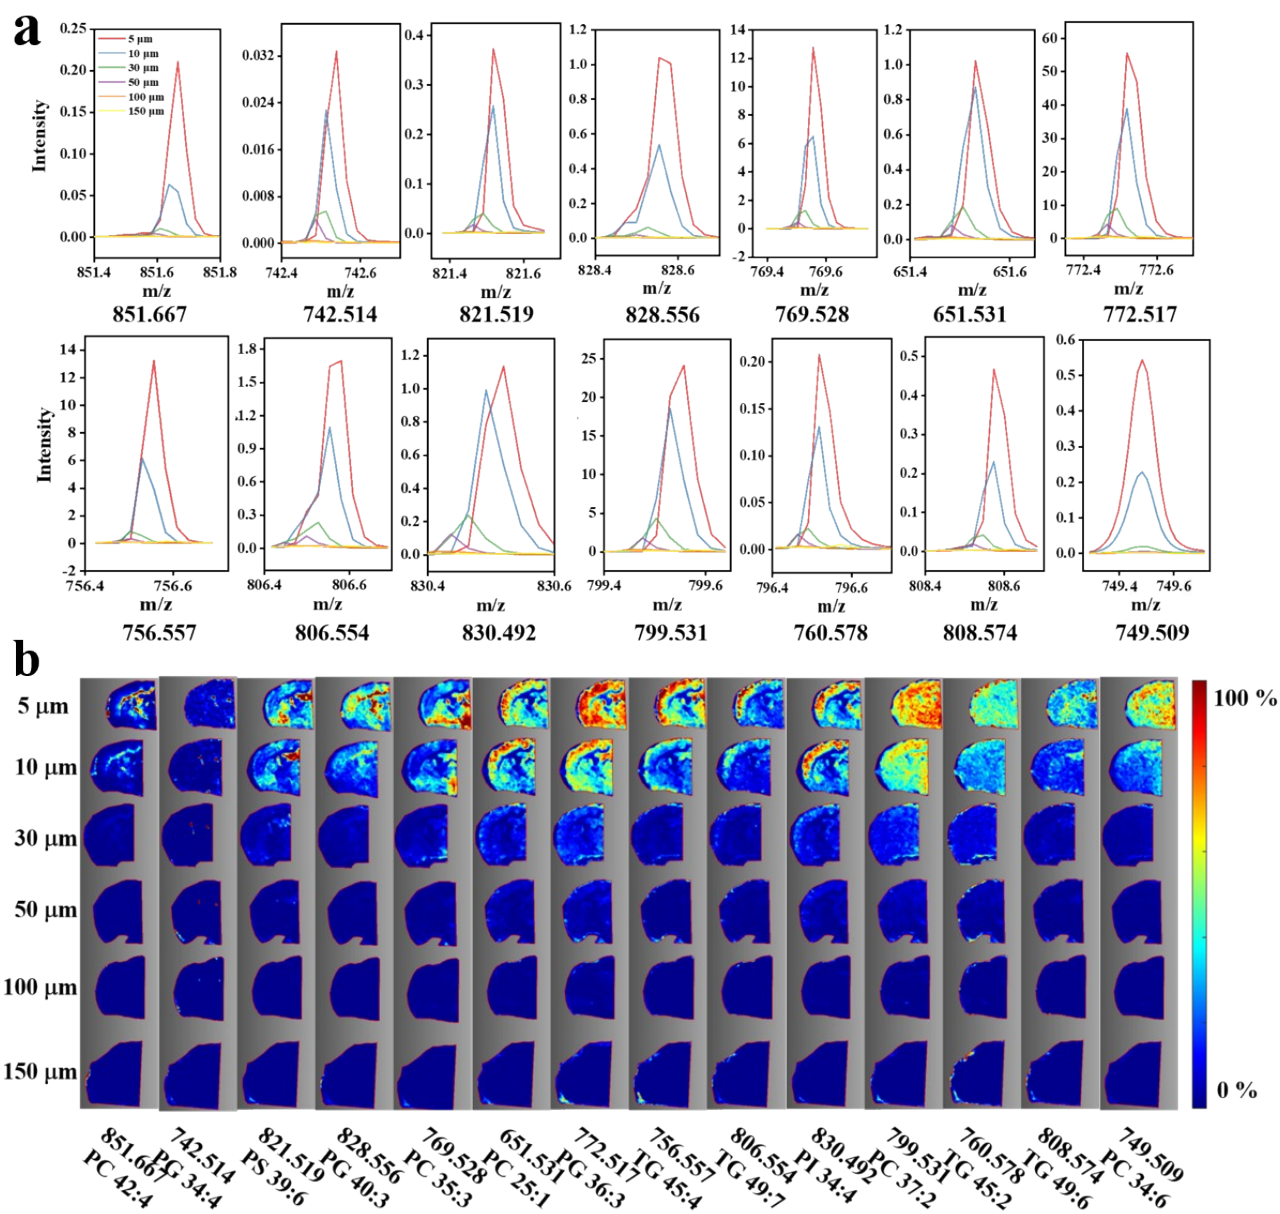

**Figure S4. a.** 14 representative lipid ions vacuum MALDI MS peaks acquired from continuous mouse half brain tissue section with different thicknesses: 5, 10, 30, 50, 100, 150  $\mu\text{m}$  **b.** Vacuum MALDI MS images of the above 14 representative lipids.

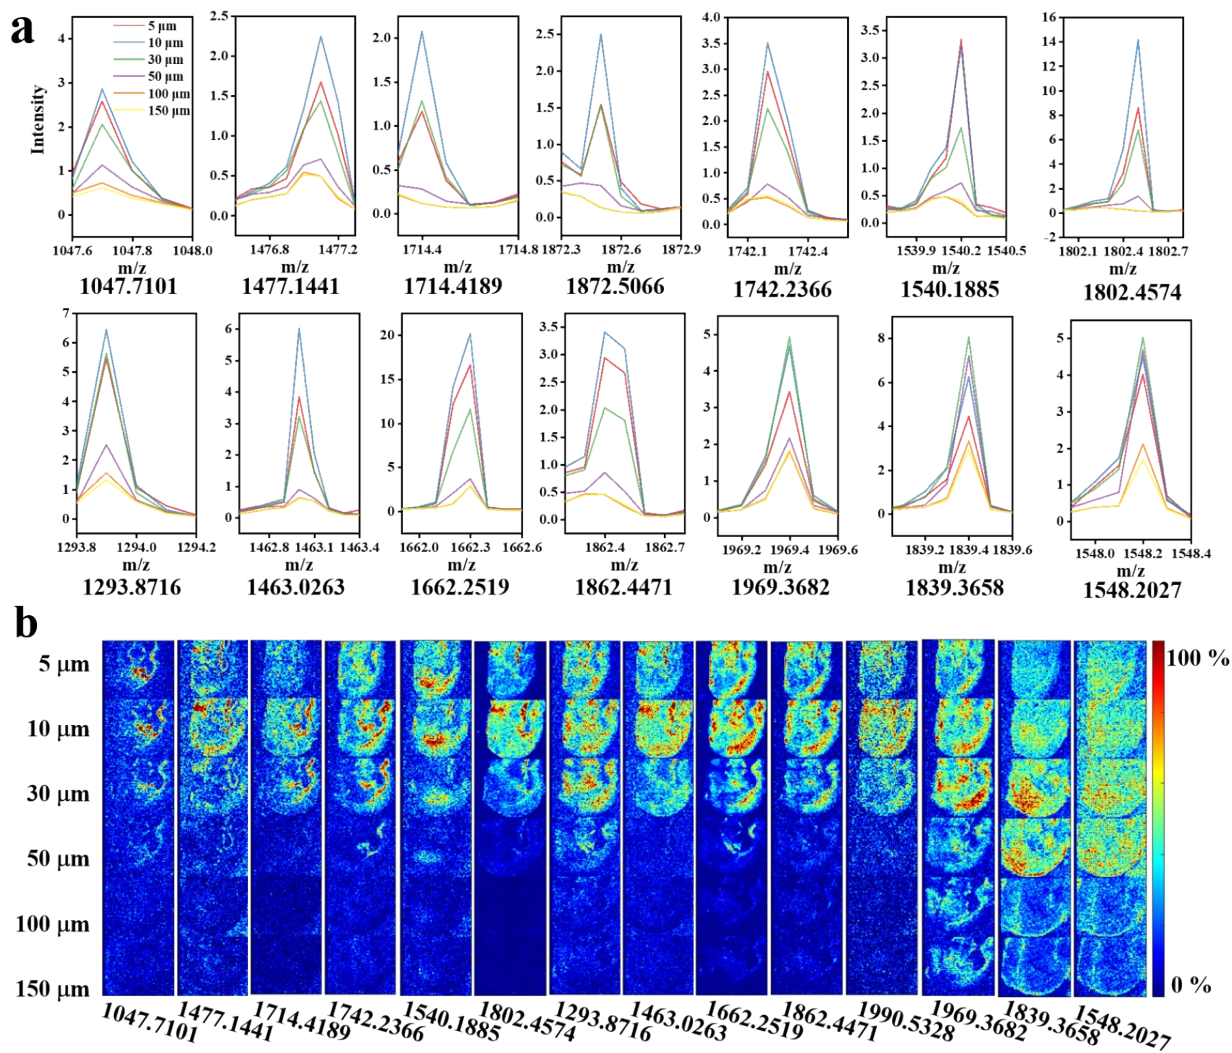

**Figure S5. a.** 14 representative peptide ions AP MALDI MS peaks acquired from continuous mouse half brain tissue section with different thicknesses: 5, 10, 30, 50, 100, 150  $\mu\text{m}$  **b.** AP MALDI MS images of the above 14 representative peptides



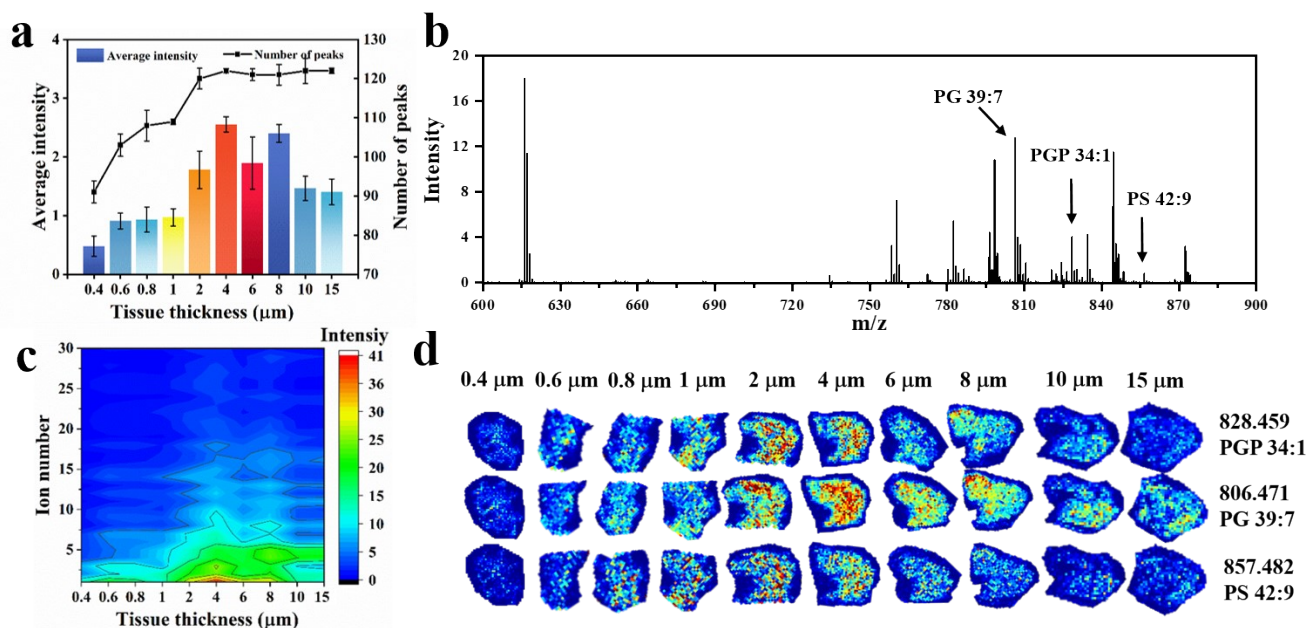

**Figure S6.** Vacuum MALDI MS data obtained from serial mouse heart tissue slices with different thicknesses. The area of section is about 4 square millimeters. **a.** Average signal intensity and number of lipid ions. **b.** Average mass spectra of all sections. **c.** Heatmap composed of 30 ions with the strongest signal intensity **d.** MALDI MS images of 6 representative lipids

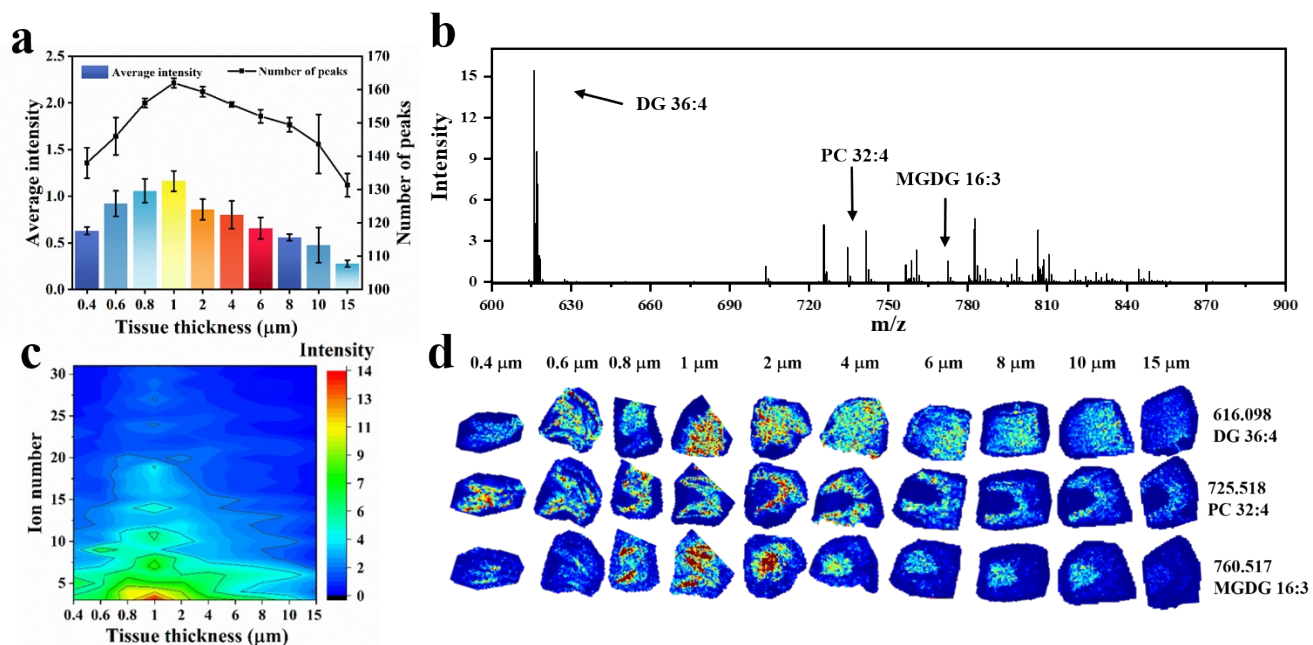

**Figure S7.** Vacuum MALDI MS data obtained from serial mouse liver tissue slices with different thicknesses. The area of section is about 4 square millimeters. **a.** Average signal intensity and number of lipid ions. **b.** Average mass spectra of all sections. **c.** Heatmap composed of 30 ions with the strongest signal intensity **d.** MALDI MS images of 6 representative lipids.



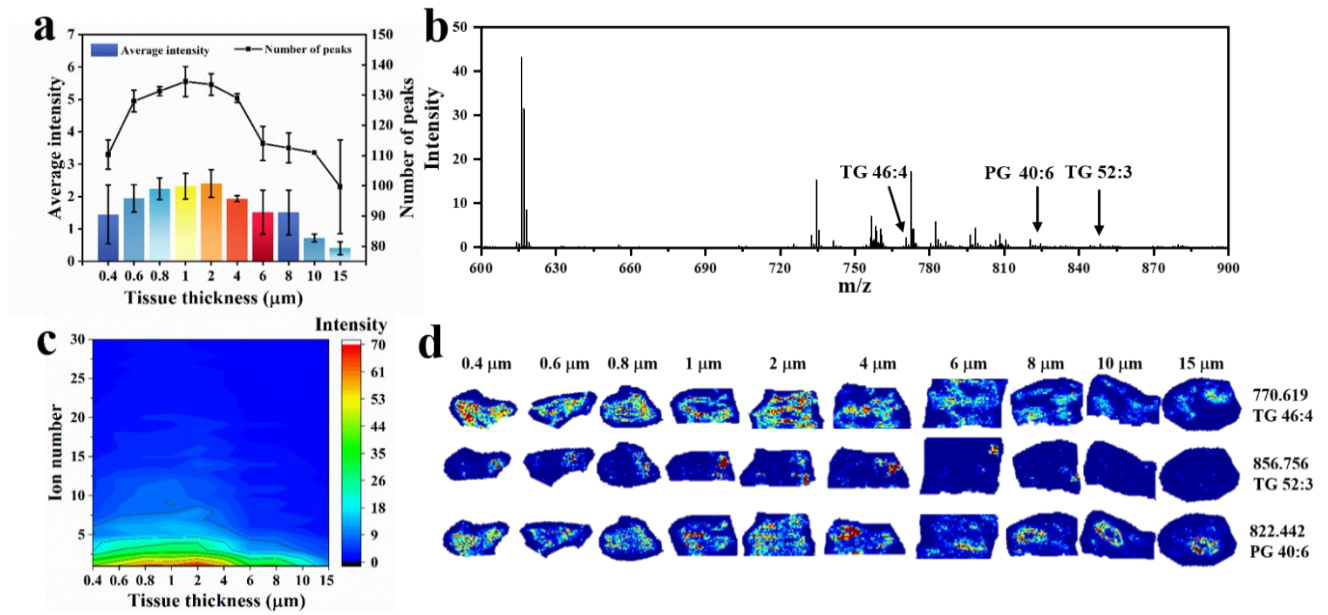

**Figure S8.** Vacuum MALDI MS data obtained from serial mouse lung tissue slices with different thicknesses. The area of section is about 4 square millimeters. **a.** Average signal intensity and number of lipid ions. **b.** Average mass spectra of all sections. **c.** Heatmap composed of 30 ions with the strongest signal intensity **d.** MALDI MS images of 6 representative lipids.

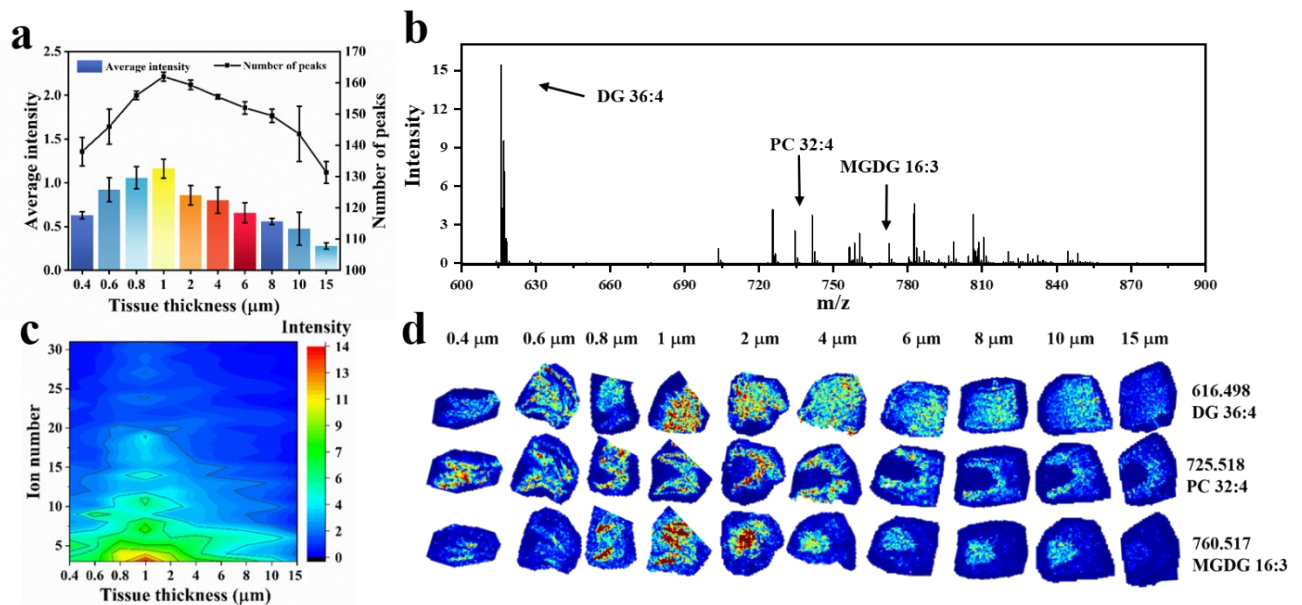

**Figure S9.** Vacuum MALDI MS data obtained from serial mouse kidney tissue slices with different thicknesses. The area of section is about 4 square millimeters. **a.** Average signal intensity and number of lipid ions. **b.** Average mass spectra of all sections. **c.** Heatmap composed of 30 ions with the strongest signal intensity **d.** MALDI MS images of 6 representative lipids.

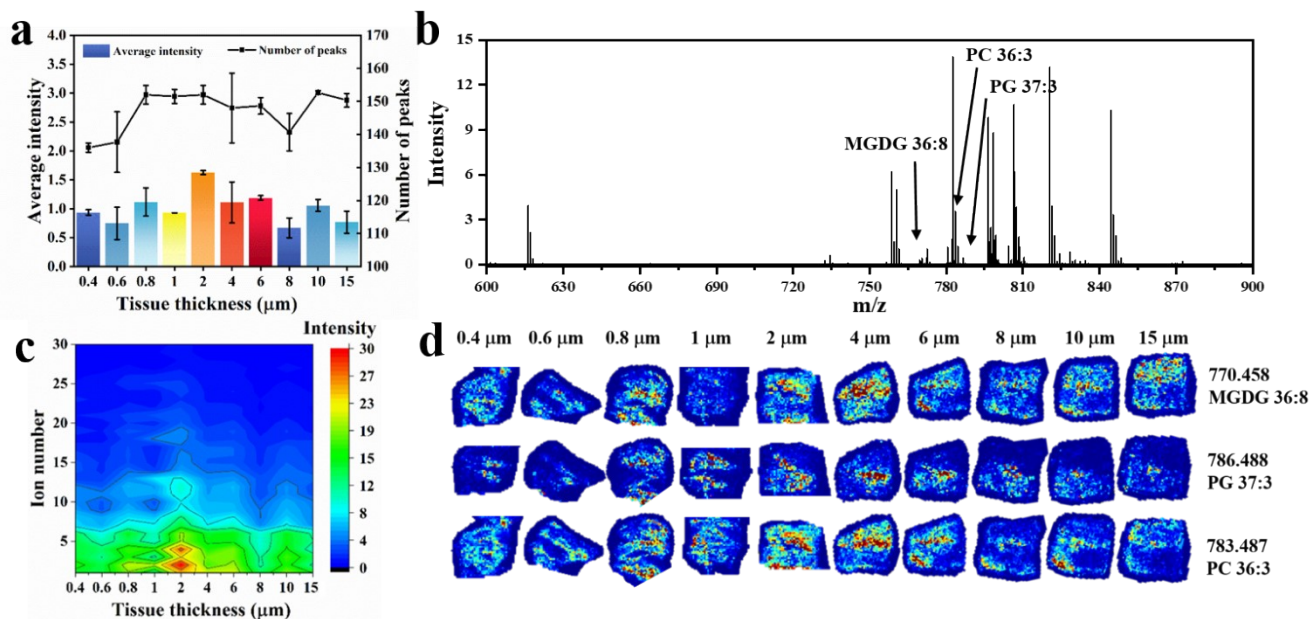

**Figure S10.** Vacuum MALDI MS data obtained from serial mouse muscle tissue slices with different thicknesses. The area of section is about 4 square millimeters. **a.** Average signal intensity and number of lipid ions. **b.** Average mass spectra of all sections. **c.** Heatmap composed of 30 ions with the strongest signal intensity. **d.** MALDI MS images of 6 representative lipids.

**Table S1. Percentage reduction in average peak intensity and peak number relative to 5  $\mu\text{m}$  (%)**

|           | Tissue thickness( $\mu\text{m}$ ) | 10   | 30   | 50   | 100  | 150  | Average reduction |
|-----------|-----------------------------------|------|------|------|------|------|-------------------|
| Intensity | Vacuum                            | 35.5 | 81.3 | 93.5 | 98.4 | 98.3 | 81.4              |
|           | AP                                | 25.6 | 42.7 | 63.9 | 86.9 | 99.6 | 61.7              |
| Number    | Vacuum                            | 5.5  | 21.3 | 75.6 | 91.5 | 97.0 | 58.1              |
|           | AP                                | 3.0  | 9.9  | 30.0 | 82.2 | 95.1 | 41.0              |

**Table S2.** Representative lipids detected in mouse brain tissue section by AP MALDI MS in positive ion mode

| m/z detected | Compound name | Molecular Formula                               | compound_id                  | exact Mass | delta   |
|--------------|---------------|-------------------------------------------------|------------------------------|------------|---------|
| 730.6560     | DG 44:3       | $\text{C}_{47}\text{H}_{86}\text{O}_5$          | <a href="#">LMGL02010272</a> | 730.6475   | -0.0084 |
| 735.7129     | Cer 47:1      | $\text{C}_{47}\text{H}_{93}\text{NO}_4$         | <a href="#">LMSP02010106</a> | 735.7104   | -0.0024 |
| 746.6524     | TG 44:2       | $\text{C}_{47}\text{H}_{86}\text{O}_6$          | <a href="#">LMGL03012647</a> | 746.6424   | -0.0099 |
| 748.6115     | TG 44:1       | $\text{C}_{47}\text{H}_{88}\text{O}_6$          | <a href="#">LMGL03012646</a> | 748.6581   | 0.0465  |
| 765.6120     | PC 36:5       | $\text{C}_{44}\text{H}_{80}\text{NO}_7\text{P}$ | <a href="#">LMGP01020058</a> | 765.5672   | -0.0447 |

|          |          |                                                   |                              |          |         |
|----------|----------|---------------------------------------------------|------------------------------|----------|---------|
| 768.6391 | TG 46:5  | C <sub>49</sub> H <sub>84</sub> O <sub>6</sub>    | <a href="#">LMGL03012657</a> | 768.6268 | -0.0123 |
| 769.6450 | Cer 39:1 | C <sub>45</sub> H <sub>87</sub> NO <sub>8</sub>   | <a href="#">LMSP0501AA31</a> | 769.6432 | -0.0018 |
| 788.7041 | TG 47:2  | C <sub>50</sub> H <sub>92</sub> O <sub>6</sub>    | <a href="#">LMGL03012729</a> | 788.6894 | -0.0147 |
| 788.7680 | FA 53:1  | C <sub>53</sub> H <sub>104</sub> O <sub>3</sub>   | <a href="#">LMFA01160026</a> | 788.7985 | 0.0305  |
| 792.6427 | TG 48:7  | C <sub>51</sub> H <sub>84</sub> O <sub>6</sub>    | <a href="#">LMGL03012833</a> | 792.6268 | -0.0159 |
| 793.6627 | PC 38:5  | C <sub>46</sub> H <sub>84</sub> NO <sub>7</sub> P | <a href="#">LMGP01020066</a> | 793.5985 | -0.0641 |
| 798.7682 | TG 48:4  | C <sub>51</sub> H <sub>90</sub> O <sub>6</sub>    | <a href="#">LMGL03012671</a> | 798.6737 | -0.0944 |
| 810.7718 | TG 49:5  | C <sub>52</sub> H <sub>90</sub> O <sub>6</sub>    | <a href="#">LMGL03012958</a> | 810.6737 | -0.0980 |
| 822.8016 | TG 50:6  | C <sub>53</sub> H <sub>90</sub> O <sub>6</sub>    | <a href="#">LMGL03012782</a> | 822.6737 | -0.1279 |
| 827.6511 | PC 39:2  | C <sub>47</sub> H <sub>90</sub> NO <sub>8</sub> P | <a href="#">LMGP01011746</a> | 827.6404 | -0.0107 |
| 838.7812 | TG 51:5  | C <sub>54</sub> H <sub>94</sub> O <sub>6</sub>    | <a href="#">LMGL03010081</a> | 838.705  | -0.0762 |
| 847.7593 | PS 41:0  | C <sub>47</sub> H <sub>94</sub> NO <sub>9</sub> P | <a href="#">LMGP03020065</a> | 847.6666 | -0.0926 |
| 849.7370 | PC 42:5  | C <sub>50</sub> H <sub>92</sub> NO <sub>7</sub> P | <a href="#">LMGP01030103</a> | 849.6611 | -0.0758 |
| 865.7287 | PC 42:4  | C <sub>50</sub> H <sub>92</sub> NO <sub>8</sub> P | <a href="#">LMGP01011804</a> | 865.6561 | -0.0726 |
| 896.7771 | TG 55:4  | C <sub>58</sub> H <sub>104</sub> O <sub>6</sub>   | <a href="#">LMGL03010380</a> | 896.7832 | 0.0061  |

**Table S3. Representative lipids detected in mouse brain tissue section by vacuum MALDI MS in positive ion mode**

| m/z detected | Compound name | Molecular Formula                                 | LM ID                        | m/z exact | delta  |
|--------------|---------------|---------------------------------------------------|------------------------------|-----------|--------|
| 616.498      | DG 36:4       | C <sub>39</sub> H <sub>68</sub> O <sub>5</sub>    | <a href="#">LMGL02010063</a> | 616.507   | 0.009  |
| 651.531      | PC 25:1       | C <sub>33</sub> H <sub>66</sub> NO <sub>9</sub> P | <a href="#">LMGP01020279</a> | 651.448   | -0.083 |
| 725.518      | PC 32:4       | C <sub>40</sub> H <sub>72</sub> NO <sub>8</sub> P | <a href="#">LMGP01010499</a> | 725.500   | -0.018 |
| 742.514      | PG 34:4       | C <sub>40</sub> H <sub>71</sub> O <sub>10</sub> P | <a href="#">LMGP04010067</a> | 742.478   | -0.036 |
| 749.509      | PC 34:6       | C <sub>42</sub> H <sub>72</sub> NO <sub>8</sub> P | <a href="#">LMGP01010447</a> | 749.500   | 0.009  |
| 756.557      | TG 45:4       | C <sub>48</sub> H <sub>84</sub> O <sub>6</sub>    | <a href="#">LMGL03013198</a> | 756.627   | 0.070  |
| 760.517      | MGDG 16:3     | C <sub>43</sub> H <sub>68</sub> O <sub>11</sub>   | <a href="#">LMGL05010027</a> | 760.476   | -0.041 |
| 760.578      | TG 45:2       | C <sub>48</sub> H <sub>88</sub> O <sub>6</sub>    | <a href="#">LMGL03013196</a> | 760.658   | 0.080  |
| 769.528      | PC 35:3       | C <sub>43</sub> H <sub>80</sub> NO <sub>8</sub> P | <a href="#">LMGP01011423</a> | 769.562   | 0.034  |
| 770.619      | TG 46:4       | C <sub>49</sub> H <sub>86</sub> O <sub>6</sub>    | <a href="#">LMGL03012656</a> | 770.642   | 0.023  |
| 770.458      | MGDG 36:8     | C <sub>45</sub> H <sub>70</sub> O <sub>10</sub>   | <a href="#">LMGL05010017</a> | 770.497   | 0.039  |
| 772.433      | PG 36:3       | C <sub>42</sub> H <sub>77</sub> O <sub>10</sub> P | <a href="#">LMGP04010136</a> | 772.525   | 0.092  |
| 772.517      | PG 36:3       | C <sub>42</sub> H <sub>77</sub> O <sub>10</sub> P | <a href="#">LMGP04010136</a> | 772.525   | 0.008  |
| 783.487      | PC 36:3       | C <sub>44</sub> H <sub>82</sub> NO <sub>8</sub> P | <a href="#">LMGP01010622</a> | 783.578   | 0.091  |
| 783.487      | PC 36:3       | C <sub>44</sub> H <sub>82</sub> NO <sub>8</sub> P | <a href="#">LMGP01010622</a> | 783.578   | 0.091  |

|         |           |                                                                |                              |         |        |
|---------|-----------|----------------------------------------------------------------|------------------------------|---------|--------|
| 786.488 | PG 37:3   | C <sub>43</sub> H <sub>79</sub> O <sub>10</sub> P              | <a href="#">LMGP04010189</a> | 786.541 | 0.053  |
| 796.475 | FA 47:11  | C <sub>47</sub> H <sub>72</sub> O <sub>10</sub>                | <a href="#">LMFA01031214</a> | 796.513 | 0.038  |
| 799.531 | PC 37:2   | C <sub>45</sub> H <sub>86</sub> NO <sub>8</sub> P              | <a href="#">LMGP01011428</a> | 799.609 | 0.078  |
| 806.471 | PG 39:7   | C <sub>45</sub> H <sub>75</sub> O <sub>10</sub> P              | <a href="#">LMGP04010277</a> | 806.510 | 0.039  |
| 806.554 | TG 49:7   | C <sub>52</sub> H <sub>86</sub> O <sub>6</sub>                 | <a href="#">LMGL03013321</a> | 806.642 | 0.088  |
| 808.574 | TG 49:6   | C <sub>52</sub> H <sub>88</sub> O <sub>6</sub>                 | <a href="#">LMGL03013294</a> | 808.658 | 0.084  |
| 820.473 | PG 40:7   | C <sub>46</sub> H <sub>77</sub> O <sub>10</sub> P              | <a href="#">LMGP04010043</a> | 820.525 | 0.052  |
| 821.519 | PS 39:6   | C <sub>45</sub> H <sub>76</sub> NO <sub>10</sub> P             | <a href="#">LMGP03010892</a> | 821.521 | 0.002  |
| 822.442 | PG 40:6   | C <sub>46</sub> H <sub>79</sub> O <sub>10</sub> P              | <a href="#">LMGP04010040</a> | 822.541 | 0.099  |
| 826.483 | PG 40:4   | C <sub>46</sub> H <sub>83</sub> O <sub>10</sub> P              | <a href="#">LMGP04010364</a> | 826.572 | 0.089  |
| 828.459 | PGP 34:1  | C <sub>40</sub> H <sub>78</sub> O <sub>13</sub> P <sub>2</sub> | <a href="#">LMGP05010001</a> | 828.492 | 0.033  |
| 828.556 | PG 40:3   | C <sub>46</sub> H <sub>85</sub> O <sub>10</sub> P              | <a href="#">LMGP04010338</a> | 828.588 | 0.032  |
| 830.492 | PI 34:4   | C <sub>43</sub> H <sub>75</sub> O <sub>13</sub> P              | <a href="#">LMGP06010035</a> | 830.495 | 0.003  |
| 850.491 | SQDG 36:0 | C <sub>45</sub> H <sub>86</sub> O <sub>12</sub> S              | <a href="#">LMGL05010062</a> | 850.584 | 0.093  |
| 851.667 | PC 42:4   | C <sub>50</sub> H <sub>94</sub> NO <sub>7</sub> P              | <a href="#">LMGP01020243</a> | 851.677 | 0.010  |
| 856.756 | TG 52:3   | C <sub>55</sub> H <sub>100</sub> O <sub>6</sub>                | <a href="#">LMGL03010099</a> | 856.752 | -0.004 |
| 857.482 | PS 42:9   | C <sub>48</sub> H <sub>76</sub> NO <sub>10</sub> P             | <a href="#">LMGP03010619</a> | 857.521 | 0.039  |

**Table S4.** Peptides percentage reduction relative to 5  $\mu$ m (%)

| Tissue thickness( $\mu$ m) | 10   | 30   | 50   | 100  | 150  | Average reduction |
|----------------------------|------|------|------|------|------|-------------------|
| Average intensity          | -2.7 | 21.1 | 49.1 | 67.3 | 74.2 | 41.8              |
| Peak number                | -1.6 | 21.8 | 37.5 | 68.7 | 76.6 | 40.6              |

**Table S5.** 14 representative peptides detected in mouse brain tissue section by AP MALDI MS in positive ion mode

| m/z detected | m/z library | $\Delta$ M | Peptide Sequence | Protein        |
|--------------|-------------|------------|------------------|----------------|
| 1047.7101    | 1047.6309   | 0.0791     | LLNIQPPPR        | Q91WD5         |
| 1293.8716    | 1293.7525   | 0.1190     | LAILGIHNEVSK     | A1BN54         |
| 1463.0263    | 1463.6543   | -0.6280    | NLLSCENS DQGAR   | Q548L6         |
| 1477.1441    | 1477.6554   | -0.5112    | SASESYTQSFQSR    | Q2TBE6         |
| 1477.1441    | 1477.6554   | -0.5112    | SASESYTQSFQSR    | Q2TBE6         |
| 1540.1885    | 1540.7312   | -0.5426    | NVEGDMLYQSLK     | Q5SWR1; Q5SVG5 |
| 1548.2027    | 1548.69     | -0.4872    | YAFSFAQAQEACAR   | Q61361         |
| 1662.2519    | 1662.7468   | -0.4949    | GFGFVCFSSPEEATK  | P29341; Q99LF8 |
| 1714.4189    | 1714.6802   | -0.2613    | GESEDDFWWCIDR    | Q80SW1; F8WGT1 |
| 1802.4574    | 1802.82     | -0.3626    | GADIMYTGTLDCWRK  | Q8BVI9; P48962 |

|           |           |        |                      |            |
|-----------|-----------|--------|----------------------|------------|
| 1839.3658 | 1839.0011 | 0.3647 | HKQEFLDKPEDVLLK      | E9PV14     |
| 1862.4471 | 1862.0858 | 0.3612 | TVLQRPLSLIQGPPGTGK   | Q9EPU0     |
| 1969.3682 | 1969.0502 | 0.3180 | HIAIISGAGVSAESGVPTFR | A0A1Y7VM56 |
| 1990.5328 | 1990.1345 | 0.3983 | APIRPDIVNFVHTNLRK    | Q9D8E6     |

**Table S6. Theoretical optimal MALDI MSI slice thickness range of various tissues in mice**

| Tissue                     | brain | heart | liver | lung | kidney | muscle |
|----------------------------|-------|-------|-------|------|--------|--------|
| thickness( $\mu\text{m}$ ) | 2-8   | 4-8   | 0.8-2 | 1-4  | 0.8-2  | 2-6    |

#### References

1. L. Gao, H. Ge, X. Huang, K. Liu, Y. Zhang, W. Xu and Y. Wang, *Mol Cell Proteomics*, 2015, **14**, 340-353.
2. J. A. Vizcaino, R. G. Cote, A. Csordas, J. A. Dianes, A. Fabregat, J. M. Foster, J. Griss, E. Alpi, M. Birim, J. Contell, G. O'Kelly, A. Schoenegger, D. Ovelleiro, Y. Perez-Riverol, F. Reisinger, D. Rios, R. Wang and H. Hermjakob, *Nucleic Acids Res*, 2013, **41**, D1063-1069.
